# Supplementary material for: Controlled synthesis of α-FeOOH nanorods and their transformation to mesoporous α-Fe2O3, Fe3O4@C nanorods as anodes for lithium ion batteries
Source: Royal Society of Chemistry journal article supplement (doi:10.1039/c3ra41886c), 2013-01-01
Supplement: c3ra41886c.pdf [file c3ra41886c.pdf]

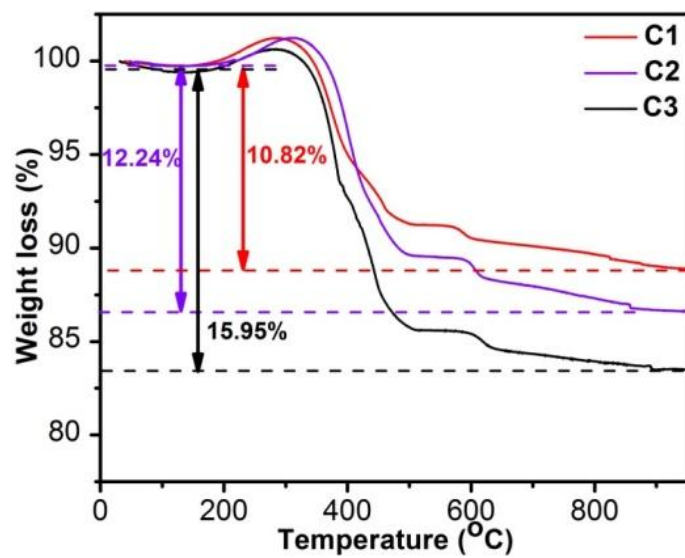

Fig. S1 Thermogravimetric analysis (TGA) curves of the samples C1, C2 and C3.

5

10

15

20

25

30

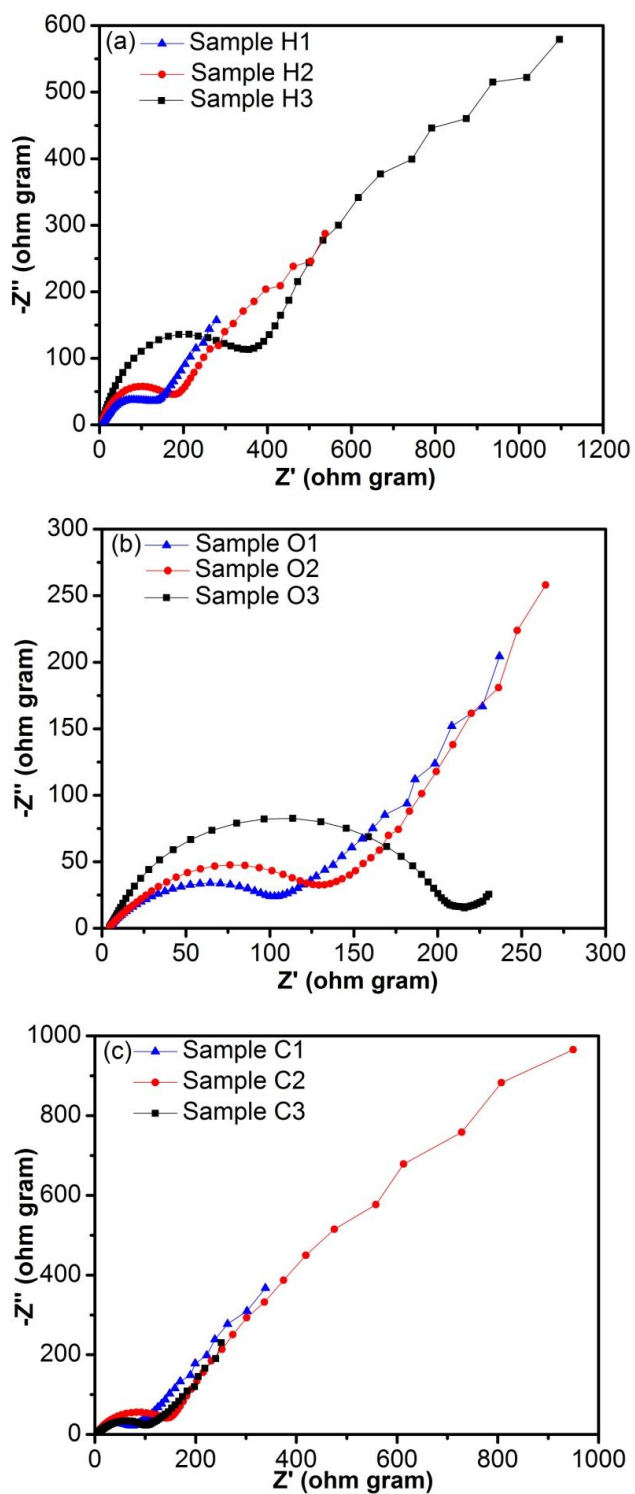

**Fig. S2** (a) EIS spectra of (a)  $\alpha$ -FeOOH nanorods, (b)  $\alpha$ -Fe<sub>2</sub>O<sub>3</sub> nanorods and (c) Fe<sub>3</sub>O<sub>4</sub> nanorods in the frequency range of 0.1-10<sup>6</sup> Hz.
